# Supplementary material
Source: PubMed Central journal article supplement (PMC8015186)
Supplement: NIHMS1627843-supplement-Supp_info.pdf [file NIHMS1627843-supplement-Supp_info.pdf]

## Supplementary material

### **Protein interactions within and between two F-type type IV secretion systems**

Birgit Koch<sup>1</sup>, Melanie M. Callaghan<sup>2</sup>, Jonathan Tellechea Luzardo<sup>1</sup>, Ami Y. Seeger<sup>2</sup>, Joseph P. Dillard<sup>2</sup>, and Natalio Krasnogor<sup>1</sup>

<sup>1</sup>Interdisciplinary Computing and Complex BioSystems (ICOS), School of Computing Science, Urban Sciences Building, Newcastle University, 1 Science Square Science Central, Newcastle upon Tyne NE4 5TG, U.K

<sup>2</sup>Department of Medical Microbiology and Immunology, University of Wisconsin-Madison, Madison, Wisconsin, 53706-1521 USA

Corresponding author: Natalio Krasnogor; E-mail: natalio.krasnogor@ncl.ac.uk; Tel: + 44 191 208 5035, Fax: +44 191 208 8232

#### Content

|                                                                                                  |             |
|--------------------------------------------------------------------------------------------------|-------------|
| Table S1. Strain and plasmid list, including link to Cellrepo.                                   | Page 2 – 6  |
| Table S2 Primer list                                                                             | Page 7 - 8  |
| Fig. S1. Two-hybrid interactions. <i>Neisseria</i> proteins and corresponding mixed interactions | Page 9      |
| Fig. S2. Two-hybrid interactions. F-plasmid proteins and corresponding mixed interactions        | Page 10     |
| Fig. S3 Mixed two-hybrid interactions corresponding to shared interactions                       | Page 11     |
| Fig. S4 Pull-down experiments                                                                    | Page 12 –13 |
| References                                                                                       | Page 14     |

**Table S1. Strains and plasmids used in this study**

|                                            | Relevant description                                                                                                                                                                                                                                                                | Reference or source      |
|--------------------------------------------|-------------------------------------------------------------------------------------------------------------------------------------------------------------------------------------------------------------------------------------------------------------------------------------|--------------------------|
| <i>Neisseria gonorrhoeae</i>               |                                                                                                                                                                                                                                                                                     |                          |
| <b>MS11</b>                                | WT <i>N. gonorrhoeae</i>                                                                                                                                                                                                                                                            | (Swanson, 1972)          |
| <b>AY529</b>                               | MS11 transformed with pAY28                                                                                                                                                                                                                                                         | This study               |
| <b>AY534</b>                               | MS11 transformed with pAY27                                                                                                                                                                                                                                                         | This study               |
| <b>PK127</b>                               | MS11 $\Delta$ <i>atlA</i>                                                                                                                                                                                                                                                           | (Kohler et al. 2007)     |
| <b>MR535</b>                               | MS11 $\Delta$ <i>traK</i>                                                                                                                                                                                                                                                           | (Ramsey et al. 2014)     |
| <b>PK186</b>                               | MS11 $\Delta$ <i>traG</i>                                                                                                                                                                                                                                                           | (Kohler et al. 2013)     |
| <b>AY534<math>\Delta</math><i>atlA</i></b> | PK127 transformed with pAY27                                                                                                                                                                                                                                                        | This study               |
| <b>AY534<math>\Delta</math><i>traK</i></b> | MR535 transformed with pAY27                                                                                                                                                                                                                                                        | This study               |
| <b>AY534<math>\Delta</math><i>traG</i></b> | PK186 transformed with pAY27                                                                                                                                                                                                                                                        | This study               |
| <i>Escherichia coli</i>                    |                                                                                                                                                                                                                                                                                     |                          |
| <b>JM101</b>                               | F' <i>traD36 proA<sup>+</sup>B<sup>+</sup> lacI<sup>q</sup> <math>\Delta</math>(lacZ)M15/ <math>\Delta</math>(lac-proAB) glnV thi</i>                                                                                                                                               | New England Biolabs      |
| <b>BTH101</b>                              | (F-, <i>cya-99, araD139, galE15, galK16, rpsL1 (Str<sup>r</sup>), hsdR2, mcrA1, mcrB1</i> )                                                                                                                                                                                         | Euromedex                |
| <b>10-beta</b>                             | $\Delta$ ( <i>ara-leu</i> )7697 <i>araD139 fhuA <math>\Delta</math>lacX74 galK16 galE15 e14- <math>\phi</math>80dlacZ<math>\Delta</math>M15 recA1 relA1 endA1 nupG rpsL (Str<sup>R</sup>) rph spoT1 <math>\Delta</math>(mrr-hsdRMS-mcrBC)</i>                                       | New England Biolabs      |
| <b>BL21(DE3)</b>                           | F-, <i>lon-11, <math>\Delta</math>(ompT-nfrA)885, <math>\Delta</math>(galM-ybhJ)884, <math>\lambda</math>DE3 [<i>lacI, lacUV5-T7 gene 1, ind1, sam7, nin5</i>], <math>\Delta</math>46, [<i>mal<sup>+</sup>]</i><sub>K-12</sub>(<math>\lambda</math><sup>S</sup>), <i>hsdS10</i></i> | Novagen                  |
| <b>Origami2(DE3)</b>                       | $\Delta$ ( <i>ara-leu</i> )7697 $\Delta$ <i>lacX74 <math>\Delta</math>phoA PvuII phoR araD139 ahpC galE galK rpsL F'[lac<sup>+</sup> lacI<sup>q</sup> pro] (DE3) gor522::Tn10 trxB (Str<sup>R</sup>, Tet<sup>R</sup>)</i>                                                           | Novagen                  |
| <b>Plasmids</b>                            |                                                                                                                                                                                                                                                                                     |                          |
| <b>pMR100</b>                              | plasmid for constructing C-terminal linker-FLAG3 fusions                                                                                                                                                                                                                            | (Ramsey et al. 2014)     |
| <b>pAY25</b>                               | pMR100 with TraH-FLAG3                                                                                                                                                                                                                                                              | This study               |
| <b>pMR68</b>                               | <i>iga-trpB</i> complementation construct contains the tetracycline-inducible promoter                                                                                                                                                                                              | (Ramsey et al. 2012)     |
| <b>pAY27</b>                               | pMR68 with TraH-FLAG3 under control of the tetracycline inducible promoter                                                                                                                                                                                                          | This study               |
| <b>pAY28</b>                               | pAY25 with sequence downstream of <i>traH</i> added after FLAG3 tag, used to place the FLAG3 tag at the <i>traH</i> native site                                                                                                                                                     | This study               |
| <b>pUT18C</b>                              | Bacterial two-hybrid vector designed to express a given polypeptide fused in frame at its N-terminal end with T18 fragment; ColE1 ori, Amp <sup>R</sup>                                                                                                                             | (Karimova et al., 2001)  |
| <b>pUT18</b>                               | Bacterial two-hybrid vector designed to express a given polypeptide fused in frame at its C-terminal end with T18 fragment; ColE1 ori, Amp <sup>R</sup>                                                                                                                             | (Karimova et al., 2001)  |
| <b>pUTM18C</b>                             | As pUT18C but designed to insert the TM domain 1 of <i>E. coli oppB</i> between the cloned polypeptide and the T18 fragment; ColE1 ori, Amp <sup>R</sup>                                                                                                                            | (Ouellette et al., 2014) |
| <b>pKT25</b>                               | Bacterial two-hybrid vector designed to express a given polypeptide fused in frame at its N-terminal end with T25 fragment; p15 ori, Km <sup>R</sup>                                                                                                                                |                          |
| <b>p25N</b>                                | Bacterial two-hybrid vector designed to express a given polypeptide fused in frame at its C-terminal end with T25 fragment; p15 ori, Km <sup>R</sup>                                                                                                                                | (Claessen et al., 2008)  |
| <b>pSTM25</b>                              | Bacterial two-hybrid vector designed to express a given polypeptide fused in frame at its N-terminal end with TM domain 1 of <i>E. coli oppB</i> and T25 fragment, p15 ori, Sm <sup>R</sup>                                                                                         | (Ouellette et al., 2014) |
| <b>pKTM25</b>                              | Bacterial two-hybrid vector designed to express a given polypeptide fused in frame at its N-terminal end with TM domain 1 of <i>E. coli oppB</i> and T25 fragment, p15 ori, Km <sup>R</sup> The TM region was PCR amplified from pSTM25                                             | This study               |

|                                |                                                                                     |            |
|--------------------------------|-------------------------------------------------------------------------------------|------------|
|                                | with primer pair 1/2 cut with Sall/EcoRI and cloned into Sall/EcoRI digested pKT25  |            |
| <b>pUTM18CltgX<sub>N</sub></b> | LtgX <sub>N</sub> was PCR amplified using primer pair 3/4 and cloned into pUTM18C   | This study |
| <b>pKTM25ltgX<sub>N</sub></b>  | LtgX <sub>N</sub> was PCR amplified using primer pair 3/4 and cloned into pKTM25    | This study |
| <b>pUTM18CYag<sub>N</sub></b>  | Yag <sub>N</sub> was PCR amplified using primer pair 5/7 and cloned into pUTM18C    | This study |
| <b>pKTM25Yag<sub>N</sub></b>   | Yag <sub>N</sub> was PCR amplified using primer pair 5/7 and cloned into pKTM25     | This study |
| <b>pUT18TraL<sub>N</sub></b>   | TraL <sub>N</sub> was PCR amplified using primer pair 7/8 and cloned into pUT18     | This study |
| <b>p25NTraL<sub>N</sub></b>    | TraL <sub>N</sub> was PCR amplified using primer pair 7/8 and cloned into p25N      | This study |
| <b>pUT18CTraE<sub>N</sub></b>  | TraE <sub>N</sub> was PCR amplified using primer pair 9/10 and cloned in pUT18C     | This study |
| <b>pKT25TraE<sub>N</sub></b>   | TraE <sub>N</sub> was PCR amplified using primer pair 9/10 and cloned in pKT25      | This study |
| <b>pUT18CTraK<sub>N</sub></b>  | TraK <sub>N</sub> was PCR amplified using primer pair 11/12 and cloned in pUT18C    | This study |
| <b>pUTM18CTraK<sub>N</sub></b> | TraK <sub>N</sub> was PCR amplified using primer pair 11/12 and cloned in pUTM18C   | This study |
| <b>pKT25TraK<sub>N</sub></b>   | TraK <sub>N</sub> was PCR amplified using primer pair 11/12 and cloned in pKT25     | This study |
| <b>pKTM25TraK<sub>N</sub></b>  | TraK <sub>N</sub> was PCR amplified using primer pair 11/12 and cloned in pKTM25    | This study |
| <b>pUT18CTraB<sub>N</sub></b>  | TraB <sub>N</sub> was PCR amplified using primer pair 13/14 and cloned into pUT18C  | This study |
| <b>pKT25TraB<sub>N</sub></b>   | TraB <sub>N</sub> was PCR amplified using primer pair 13/14 and cloned into pKT25   | This study |
| <b>pUTM18CDsbC<sub>N</sub></b> | DsbC <sub>N</sub> was PCR amplified using primer pair 15/16 and cloned into pUTM18C | This study |
| <b>pKTM25DsbC<sub>N</sub></b>  | DsbC <sub>N</sub> was PCR amplified using primer pair 15/16 and cloned into pKTM25  | This study |
| <b>pUT18CTraV<sub>N</sub></b>  | TraV <sub>N</sub> was PCR amplified using primer pair 17/18 and cloned into pUT18C  | This study |
| <b>pUTM18CTraV<sub>N</sub></b> | TraV <sub>N</sub> was PCR amplified using primer pair 17/18 and cloned into pUTM18C | This study |
| <b>pKT25TraV<sub>N</sub></b>   | TraV <sub>N</sub> was PCR amplified using primer pair 17/18 and cloned into pKT25   | This study |
| <b>pKTM25TraV<sub>N</sub></b>  | TraV <sub>N</sub> was PCR amplified using primer pair 17/18 and cloned into pKTM25  | This study |
| <b>pUT18CTraC<sub>N</sub></b>  | TraC <sub>N</sub> was PCR amplified using primer pair 19/20 and cloned into pUT18C  | This study |
| <b>pUT18TraC<sub>N</sub></b>   | TraC <sub>N</sub> was PCR amplified using primer pair 19/21 and cloned into pUT18C  | This study |
| <b>pKT25TraC<sub>N</sub></b>   | TraC <sub>N</sub> was PCR amplified using primer pair 19/20 and cloned into pKT25   | This study |
| <b>p25NTraC<sub>N</sub></b>    | TraC <sub>N</sub> was PCR amplified using primer pair 19/21 and cloned into p25N    | This study |
| <b>pUTM18CTraW<sub>N</sub></b> | TraW <sub>N</sub> was PCR amplified using primer pair 22/23 and cloned into pUTM18C | This study |
| <b>pKTM25TraW<sub>N</sub></b>  | TraW <sub>N</sub> was PCR amplified using primer pair 22/23 and cloned into pKTM25  | This study |
| <b>pUT18CTraU<sub>N</sub></b>  | TraU <sub>N</sub> was PCR amplified using primer pair 24/26 and cloned into pUT18C  | This study |
| <b>pUTM18CTraU<sub>N</sub></b> | TraU <sub>N</sub> was PCR amplified using primer pair 24/26 and cloned into pUTM18C | This study |
| <b>pKT25TraU<sub>N</sub></b>   | TraU <sub>N</sub> was PCR amplified using primer pair 24/26 and cloned into pKT25   | This study |

|                                |                                                                                                                        |            |
|--------------------------------|------------------------------------------------------------------------------------------------------------------------|------------|
| <b>pKTM25TraU<sub>N</sub></b>  | TraU <sub>N</sub> was PCR amplified using primer pair 24/26 and cloned into pKTM25                                     | This study |
| <b>pUTM18CTrbC<sub>N</sub></b> | TrbC <sub>N</sub> was PCR amplified using primer pair 26/28 and cloned into pUTM18C                                    | This study |
| <b>pKTM25TrbC<sub>N</sub></b>  | TrbC <sub>N</sub> was PCR amplified using primer pair 26/28 and cloned into pKTM125                                    | This study |
| <b>pUT18CTraN<sub>N</sub></b>  | TraN <sub>N</sub> was PCR amplified using primer pair 28/30 and cloned into pUT18C                                     | This study |
| <b>pUTM18CTraN<sub>N</sub></b> | TraN <sub>N</sub> was cut out from pKTM25TraN <sub>N</sub> with XbaI/BamHI and cloned into XbaI/BamHI digested pUTM18C | This study |
| <b>pKT25TraN<sub>N</sub></b>   | TraN <sub>N</sub> was PCR amplified using primer pair 29/30 and cloned into pKT25                                      | This study |
| <b>pKTM25TraN<sub>N</sub></b>  | TraN <sub>N</sub> was cut out from pUTM18CTraN <sub>N</sub> with XbaI/BamHI and cloned into XbaI/BamHI digested pKTM25 | This study |
| <b>pUTM18CTraF<sub>N</sub></b> | TraF <sub>N</sub> was PCR amplified using primer pair 32/34 and cloned into pUTM18C                                    | This study |
| <b>pKTM25TraF<sub>N</sub></b>  | TraF <sub>N</sub> was PCR amplified using primer pair 32/34 and cloned into pKTM25                                     | This study |
| <b>pUT18CTraH<sub>N</sub></b>  | TraH <sub>N</sub> was PCR amplified using primer pair 34/35 and cloned into pUT18C                                     | This study |
| <b>pUTM18CTraH<sub>N</sub></b> | TraH <sub>N</sub> was PCR amplified using primer pair 34/35 and cloned into pUTM18C                                    | This study |
| <b>pKT25TraH<sub>N</sub></b>   | TraH <sub>N</sub> was PCR amplified using primer pair 34/35 and cloned into pKT25                                      | This study |
| <b>pKTM25TraH<sub>N</sub></b>  | TraH <sub>N</sub> was PCR amplified using primer pair 34/35 and cloned into pKTM25                                     | This study |
| <b>pUT18TraG<sub>N</sub></b>   | TraG <sub>N</sub> was PCR amplified using primer pair 36/37 and cloned into pUT18                                      | This study |
| <b>p25NTraG<sub>N</sub></b>    | TraG <sub>N</sub> was PCR amplified using primer pair 36/37 and cloned into p25N                                       | This study |
| <b>pUT18CAtlA<sub>N</sub></b>  | AtlA <sub>N</sub> was PCR amplified using primer pair 38/39 and cloned into pUT18C                                     | This study |
| <b>pUT18AtlA<sub>N</sub></b>   | AtlA <sub>N</sub> was PCR amplified using primer pair 40/41 and cloned into pUT18                                      | This study |
| <b>pUTM18CAtlA<sub>N</sub></b> | AtlA <sub>N</sub> was PCR amplified using primer pair 40/42 and cloned into pUTM18C                                    | This study |
| <b>pKT25AtlA<sub>N</sub></b>   | AtlA <sub>N</sub> was PCR amplified using primer pair 40/42 and cloned into pKT25                                      | This study |
| <b>p25NAtlA<sub>N</sub></b>    | AtlA <sub>N</sub> was PCR amplified using primer pair 38/43 and cloned into pKT25                                      | This study |
| <b>pKTM25AtlA<sub>N</sub></b>  | AtlA <sub>N</sub> was PCR amplified using primer pair 40/42 and cloned into pKTM25                                     | This study |
| <b>pUT18CTraB<sub>F</sub></b>  | TraB <sub>F</sub> was PCR amplified using primer pair 44/45 and cloned into pUT18C                                     | This study |
| <b>pKT25TraB<sub>F</sub></b>   | TraB <sub>F</sub> was PCR amplified using primer pair 44/45 and cloned into pKT25                                      | This study |
| <b>pUT18CTraC<sub>F</sub></b>  | TraC <sub>F</sub> was PCR amplified using primer pair 46/48 and cloned into pUT18C                                     | This study |
| <b>pUT18TraC<sub>F</sub></b>   | TraC <sub>F</sub> was PCR amplified using primer pair 46/48 and cloned into pUT18                                      | This study |
| <b>pKT25TraC<sub>F</sub></b>   | TraC <sub>F</sub> was PCR amplified using primer pair 46/48 and cloned into pKT25                                      | This study |
| <b>p25NTraC<sub>F</sub></b>    | TraC <sub>F</sub> was PCR amplified using primer pair 46/47 and cloned into p25N                                       | This study |
| <b>pUT18CTraE<sub>F</sub></b>  | TraE <sub>F</sub> was PCR amplified using primer pair 49/50 and cloned into pUT18C                                     | This study |
| <b>pKT25TraE<sub>F</sub></b>   | TraE <sub>F</sub> was PCR amplified using primer pair 49/50 and cloned into pKT25                                      | This study |

|                                 |                                                                                                                                                                                                                             |            |
|---------------------------------|-----------------------------------------------------------------------------------------------------------------------------------------------------------------------------------------------------------------------------|------------|
| <b>pUTM18CTraF<sub>F</sub></b>  | TraF <sub>F</sub> was PCR amplified using primer pair 51/52 and cloned into pUTM18C                                                                                                                                         | This study |
| <b>pKTM25TraF<sub>F</sub></b>   | TraF <sub>F</sub> was PCR amplified using primer pair 51/52 and cloned into pKTM25                                                                                                                                          | This study |
| <b>pUTM18CTraH<sub>F</sub></b>  | TraH <sub>F</sub> was PCR amplified using primer pair 53/54 and cloned into pUTM18C                                                                                                                                         | This study |
| <b>pKTM25TraH<sub>F</sub></b>   | TraH <sub>F</sub> was PCR amplified using primer pair 53/54 and cloned into pKTM25                                                                                                                                          | This study |
| <b>pUT18CTraK<sub>F</sub></b>   | TraK <sub>F</sub> was PCR amplified using primer pair 55/56 and cloned into pUT18C                                                                                                                                          | This study |
| <b>pUTM18CTraK<sub>F</sub></b>  | TraK <sub>F</sub> was PCR amplified using primer pair 55/56 and cloned into pUTM18C                                                                                                                                         | This study |
| <b>pKT25TraK<sub>F</sub></b>    | TraK <sub>F</sub> was PCR amplified using primer pair 55/56 and cloned into pKT25                                                                                                                                           | This study |
| <b>pKTM25TraK<sub>F</sub></b>   | TraK <sub>F</sub> was PCR amplified using primer pair 55/56 and cloned into pKTM25                                                                                                                                          | This study |
| <b>pUTM18CTraU<sub>F</sub></b>  | TraU <sub>F</sub> was PCR amplified using primer pair 57/58 and cloned into pUTM18C                                                                                                                                         | This study |
| <b>pKTM25TraU<sub>F</sub></b>   | TraU <sub>F</sub> was PCR amplified using primer pair 57/58 and cloned into pKTM25                                                                                                                                          | This study |
| <b>pUT18CTraV<sub>F</sub></b>   | TraV <sub>F</sub> was PCR amplified using primer pair 59/60 and cloned into pUT18C                                                                                                                                          | This study |
| <b>pUTM18CTraV<sub>F</sub></b>  | TraV <sub>F</sub> was PCR amplified using primer pair 59/60 and cloned into pUTM18C                                                                                                                                         | This study |
| <b>pKT25TraV<sub>F</sub></b>    | TraV <sub>F</sub> was PCR amplified using primer pair 59/60 and cloned into pKT25                                                                                                                                           | This study |
| <b>pKTM25TraV<sub>F</sub></b>   | TraV <sub>F</sub> was PCR amplified using primer pair 59/60 and cloned into pKTM25                                                                                                                                          | This study |
| <b>pUTM18CTraW<sub>F</sub></b>  | TraW <sub>F</sub> was PCR amplified using primer pair 61/62 and cloned into pUTM18C                                                                                                                                         | This study |
| <b>pKTM25TraW<sub>F</sub></b>   | TraW <sub>F</sub> was PCR amplified using primer pair 61/62 and cloned into pKTM25                                                                                                                                          | This study |
| <b>pUTM18CTrbC<sub>F</sub></b>  | TrbC <sub>F</sub> was PCR amplified using primer pair 63/64 and cloned into pUTM18C                                                                                                                                         | This study |
| <b>pKTM25TrbC<sub>F</sub></b>   | TrbC <sub>F</sub> was PCR amplified using primer pair 63/64 and cloned into pKTM25                                                                                                                                          | This study |
| <b>pCOLADuet-1</b>              | Protein expression vector. Kan <sup>R</sup>                                                                                                                                                                                 | Novagen    |
| <b>pET22b</b>                   | Protein expression vector. Amp <sup>R</sup>                                                                                                                                                                                 | Novagen    |
| <b>pET22bTraV<sub>N</sub></b>   | TraV <sub>N</sub> and pET22b were PCR amplified using primer pair 67/68 and primer pair 65/66 respectively. The PCR products were combined using the NEBuilder HiFi DNA Assembly Cloning Kit (New England Biolabs.).        | This study |
| <b>pET22bTraV<sub>F</sub></b>   | TraV <sub>F</sub> and pET22b were PCR amplified using primer pair 75/76 and primer pair 73/74 respectively. The PCR products were combined using the NEBuilder HiFi DNA Assembly Cloning Kit (New England Biolabs.).        | This study |
| <b>pCOLATraW<sub>N</sub></b>    | TraW <sub>N</sub> and pCOLADuet were PCR amplified using primer pair 71/72 and primer pair 69/70 respectively. The PCR products were combined using the NEBuilder HiFi DNA Assembly Cloning Kit (New England Biolabs.).     | This study |
| <b>pCOLATrbC<sub>F</sub>-SP</b> | TrbC <sub>F</sub> -SP and pCOLADuet were PCR amplified using primer pair 77/78 and primer pair 69/70 respectively. The PCR products were combined using the NEBuilder HiFi DNA Assembly Cloning Kit (New England Biolabs.). | This study |

### Version Controlled Strains:

Version-controlled cell repositories (Tellechea-Luzardo et al., 2020) to facilitate reproduction and derivative work from this paper can be found here:

TraV<sub>N</sub>: [https://cellrepo.herokuapp.com/repositories/53?branch\\_id=68&locale=en](https://cellrepo.herokuapp.com/repositories/53?branch_id=68&locale=en)

TraV<sub>F</sub>: [https://cellrepo.herokuapp.com/repositories/56?branch\\_id=75&locale=en](https://cellrepo.herokuapp.com/repositories/56?branch_id=75&locale=en)

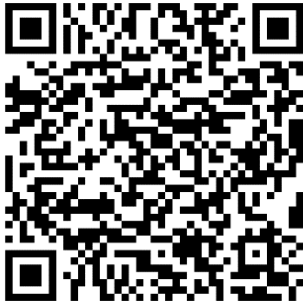

TraV<sub>N</sub>

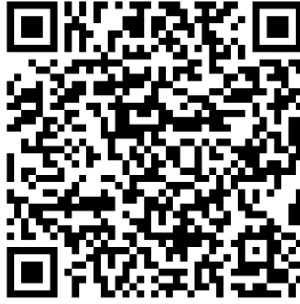

TraV<sub>F</sub>

This repository focuses on TraV proteins and describes the plasmids containing them.

Table S2. Primers used in this study. Restriction sites used for cloning are underlined

1. CCGACAACGACGTCAACAG
2. CCAGGGTTTTCCCAGTCA
3. GGAAGGATCCCTGTTATAAGGAAGCCGGCAGCAA
4. GCTACGAATTCCTACGAAGAGCGTGTTTTTAATCGTT
5. GGAAGGATCCCATGATTCTGACAGCCTGTGCC
6. GCTACGAATTCCTACCAAGTGATTACAACGGTTCTC
7. CAAGATCTAGAGATGAGAGATTATCATGTGCC
8. GCTACGAATTCGAATTTAGAACTCCCGTTTAT
9. GGAAGGATCCCATGTTGAGTGAATTGGCGATA A
10. GCTAC GAATTC TCAATTACCTCGATTACCGCC
11. GGAAGGATCCCGCGCAACGAGTGCCGGCAACA
12. GCTACGAATTC TCAACCTCCCGGACGGCTGAT
13. GGAAGGATCCCATGAGGGTGAAAGTAAACAAATT
14. GCTACGAATTCCTATTTGGTTTCGCCGGTAT
15. GGAAGGATCCCGATGTCAAACCTGTTGGAAGCACT
16. GCTACGAATTCCTCATTCTGCTCCCGCTCCATTTAA
17. CAA GATCTAGAGTCAACCTTAACCATGTCCGGT
18. AAGGGGATCCCTATCGAACGGTACCGGGAAT
19. GCTACTCTAGAGATGGGCGTCCTGTCAAATTT
20. AAGGGGATCCTTAGCGGGTTGCGGCACGGTCCCTT
21. AATTCGGATCCTCGCGGGTTGCGGCACGGTCCCTT
22. GGAAGGATCCCTCGACACCCCCTGTCGAGA
23. GCTACGAATTCCTCACGGTTTCATGACCTCTACAC
24. GCTACTCTAGAGGCTGAAGCTGTTCCCTACT
25. AAGGGGATCCTCAATTAGTCTTAAATTTATATGCACCA
26. GGAAGGATCCCGCGGATGTAGAGGCGGC
27. GCTACGAATTCCTCATTTTCTGCCTTCCAGAACGG
28. GCTACGGATCCCGCCGCACTCAGGGAA
29. AAGGCCCGGGGTATTGATATTCATAATAGTTCTTCACTTCCAA
30. GCTACTCTAGAGGCCGCACTCAGGGAAA
31. AAGGGGATCCTTATTGATATTCATAATAGTTCTTCACTTCCAAATTTTCC
32. GGAAGGATCCCGCGGATGATGGCATGGGAT
33. GCTACGAATTCCTTAATAACAATGTCCCGACAGGGCG
34. GGAAGGATCCCGGCATAGAGAAGAACATGGCT
35. GCTACGAATTCCTTAGAAACGGTTCATCGAATCAAA
36. GCTACTCTAGAGATGGCTGTGCAATACTTTACTTTC
37. CTACGGTACCCGTTCCCTTTGGGCGGAATACAGC
38. CAAGATCTAGAGATGTGGCGTGGAATATCAAGTGGA
39. TTCGCGGTACCTTAAAATCCTCTCTGCCTAAAGAA

40. GGAAGGATCCCATGTGGCGTGGAATATCAAGT
41. GCTACGAATTCAGAAATCCTCTCTGCCTAAAGAAATT
42. GCTACGAATTCCTTAAAATCCTCTCTGCCTAAAGAAATT
43. CTACGGTACCCGAAATCCTCTCTGCCTAAAGAAATT
44. GGAAGGATCCCATGGCCAGTATCAATACCATTGTG
45. GCTACGAATTCCTTATTTGCCATCGTTGCCCC
46. GGAAGGATCCCGTGAATAACCCACTTGAGGCC
47. GCTACGAATTCGATGCCACACTCCTGTATTTCT
48. GCTACGAATTCATGCCACACTCCTGTATTTCT
49. GGAAGGATCCCATGGAACACGGTGCCCG
50. GCTACGAATTCCTTATTTTTTCTCATCGTCTG
51. GGAAGGATCCCAAAGATGCAGGCTGGCAGT
52. GCTACGAATTCCTTAAAAATTGGGTTTAAAATCTTCAGAAACGTTTCAG
53. GGAAGGATCCCGATGTGAACAGCGACATGAATCAG
54. GCTACGAATTCACAGCGTGCTCCCTC
55. GGAAGGATCCCGCAAACGGTACGCTGGC
56. GCTACGAATTCAGTTGCCCTCCCG
57. GGAAGGATCCCGATTCTGCCTGTGAGGGGC
58. GCTACGAATTCACAGGAAGACACAGTTACGTTTACG
59. GGAAGGATCCAGTACGGAATTTGAGTGTAACGC
60. GCTACGAATTCCTAATTAATACGTGGTTTTCCCACG
61. GGAAGGATCCCGCCGATCTTGGTACCTGGG
62. GCTACGAATTCATTTTCTGCCCTCCTCTG
63. GGAAGGATCCCTCAGAAAACGTGAACACTCCTG
64. GCTACGAATTCATTTCCCAGGAATCTCCTTC
65. TACCGTTCGACTCGAGCACCACCACCAC
66. TACCGGACATATCCATGGCCATCGCCGG
67. GGCCATGGATATGTCCGGTATCGGCGGTAG
68. GGTGCTCGAGTCGAACGGTACCGGGAATAC
69. CTCGAGTCTGGTAAAGAAAC
70. TGTATATCTCCTTCTTATACTTAAC
71. GTATAAGAAGGAGATATACAATGTCCCACAAGAAAAAATAG
72. GTTTCTTTACCAGACTCGAGCGGTTTCATGACCTCTAC
73. ACGTATTAATCTCGAGCACCACCACCAC
74. ATTCCGTAATCCATGGCCATCGCCGG
75. GGCCATGGATAGTACGGAATTTGAGTGTAAC
76. GGTGCTCGAGATTAATACGTGGTTTTCCC
77. GTATAAGAAGGAGATATACAATGTCAGAAAACGTGAAC
78. GTTTCTTTACCAGACTCGAGTTTCCCAGGAATCTCCTTC



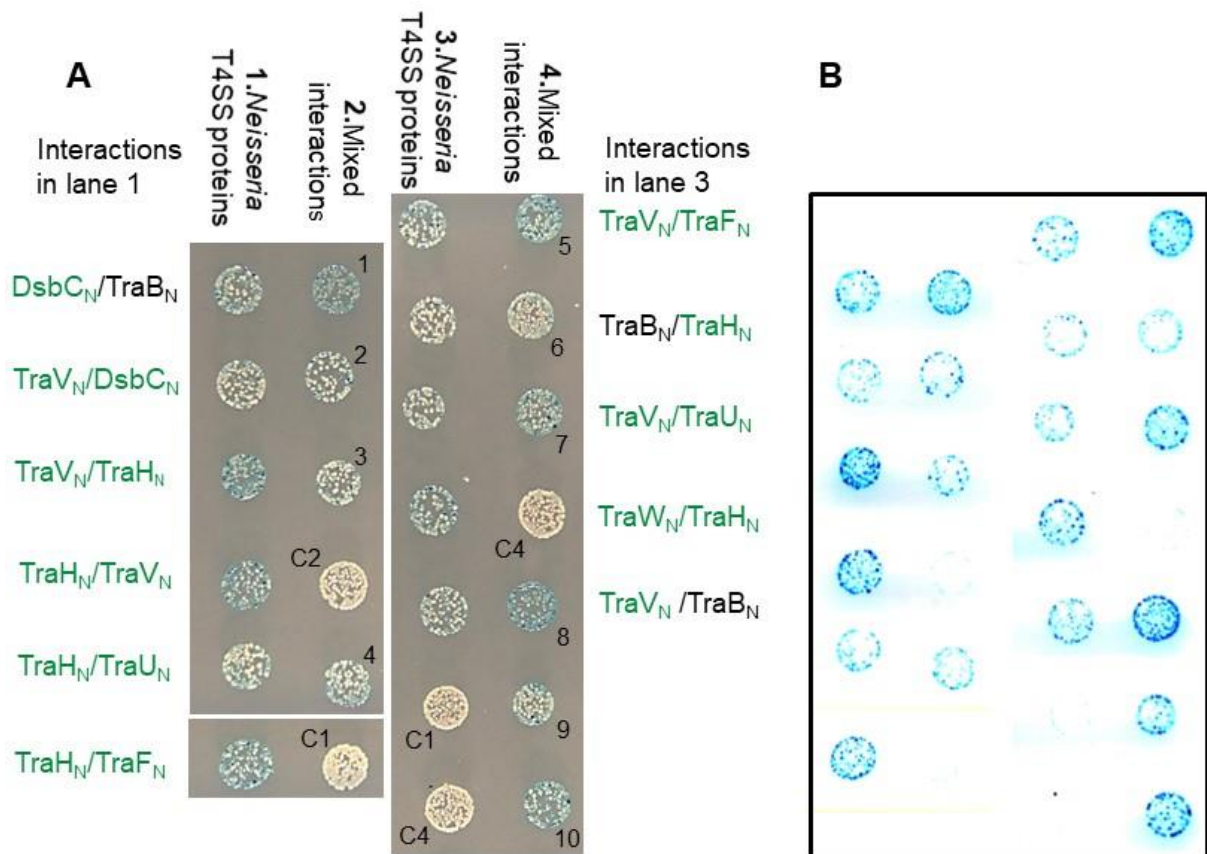

**Fig.S1.** Bacterial two-hybrid interactions between *Neisseria* proteins (lane 1 and 3) and corresponding mixed interactions defined as an interaction between a protein from the *N. gonorrhoeae* T4SS and a protein from the T4SS encoded by the F-plasmid. The figure shows colonies of *E. coli* BTH101 transformants carrying plasmids encoding the proteins indicated in the order T18/T25. Protein names in green indicate that the gene encoding the protein was cloned in a BACTH-TM system vector, black names indicate that the gene was cloned in the BACTH system vector. C1, C2, C3, C4 and C5 are vector controls; respectively pUT18C/pKT25, pUTM18C/pKTM25, pUT18/pKT25, pUT18C/pKTM25 and pUTM18C/pKT25. The mixed interactions are: 1. DsbC<sub>N</sub>/TraB<sub>F</sub>, 2. TM-TraV<sub>F</sub>/DsbC<sub>N</sub>, 3. TM-TraV<sub>F</sub>/TraH<sub>N</sub>, 4. TraU<sub>F</sub>/TraH<sub>N</sub>, 5. TM-TraV<sub>N</sub>/TraF<sub>F</sub>, 6. TraB<sub>F</sub>/TraH<sub>N</sub>, 7. TraH<sub>N</sub>/TraB<sub>F</sub>. 8. TM-TraV<sub>N</sub>/TraB<sub>F</sub>, 9. TraB<sub>F</sub>/TM-TraV<sub>N</sub>, 10. TM-TraV<sub>F</sub>/TraB<sub>N</sub>. B. Image obtained by scanning the agar plate.

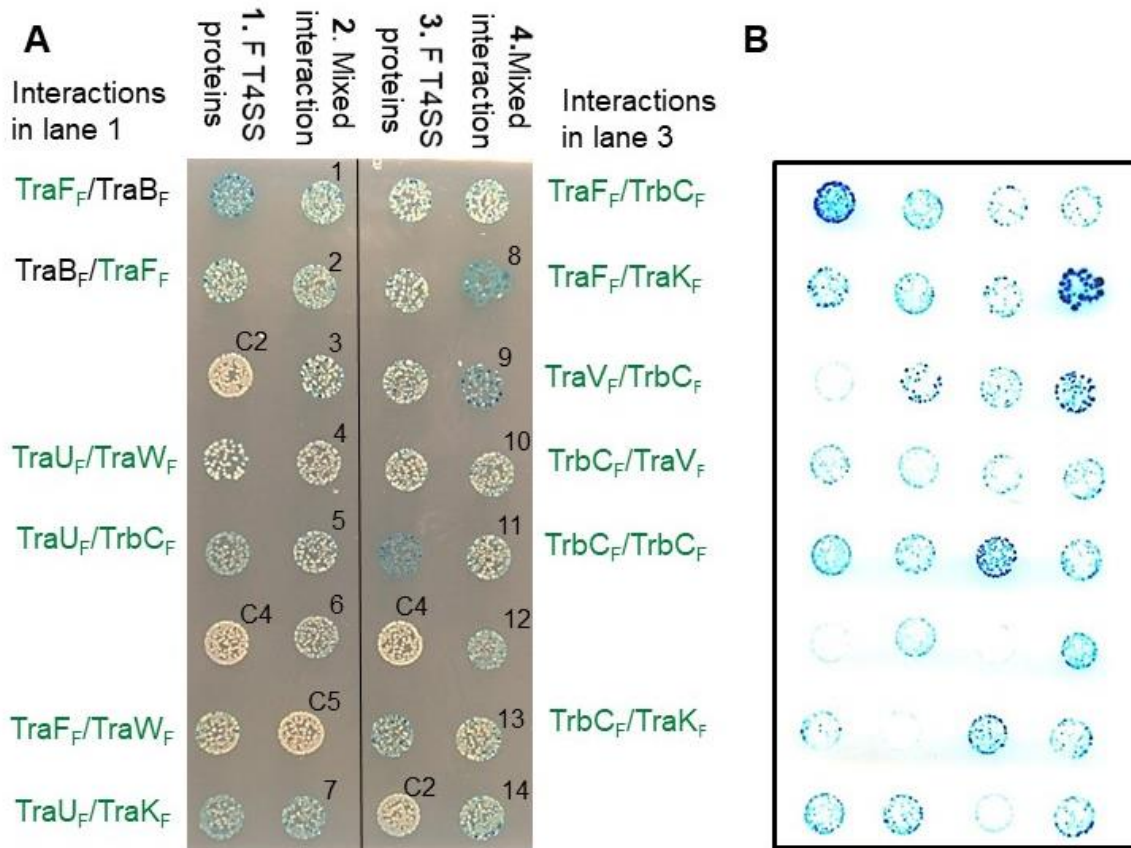

**Fig.S2.** Bacterial two-hybrid interactions between F-plasmid proteins (lane 1 and 3) and corresponding mixed interactions defined as an interaction between a protein from the *N. gonorrhoeae* T4SS and a protein from the T4SS encoded by the F-plasmid. The figure shows colonies of *E. coli* BTH101 transformants carrying plasmids encoding the proteins indicated in the order T18/T25. Protein names in green indicate that the gene encoding the protein was cloned in a BACTH-TM system vector, black names indicate that the gene was cloned in the BACTH system vector. C2, C3, C4 and C5 are vector controls; respectively pUT18C/pKT25, pUTM18C/pKTM25, pUT18/pKT25, pUT18C/pKTM25 and pUTM18C/pKT25. The mixed interactions are: 1 TraF<sub>F</sub>/TraB<sub>N</sub>, 2. TraF<sub>N</sub>/TraB<sub>F</sub>, 3. TraB<sub>F</sub>/TraF<sub>N</sub>, 4. TraU<sub>F</sub>/TraW<sub>N</sub> 5. TrbC<sub>F</sub>/TraU<sub>N</sub>, 6. TaU<sub>N</sub>/TrbC<sub>F</sub>,, 7. TraU<sub>N</sub>/TM-TraK<sub>F</sub>, 8. TraF<sub>N</sub>/TM-TraK<sub>F</sub> 9. TM-TraV<sub>N</sub>/TrbC<sub>F</sub> 10. TrbC<sub>F</sub>/TM-TraV<sub>N</sub> 11. TrbC<sub>F</sub>/TrbC<sub>N</sub>, 12. TrbC<sub>N</sub>/TrbC<sub>F</sub>, 13. TrbC<sub>N</sub>/TM-TraK<sub>F</sub>, 14. TM-TraK<sub>N</sub>/TrbC<sub>F</sub>. B. Image obtained by scanning the agar plate.

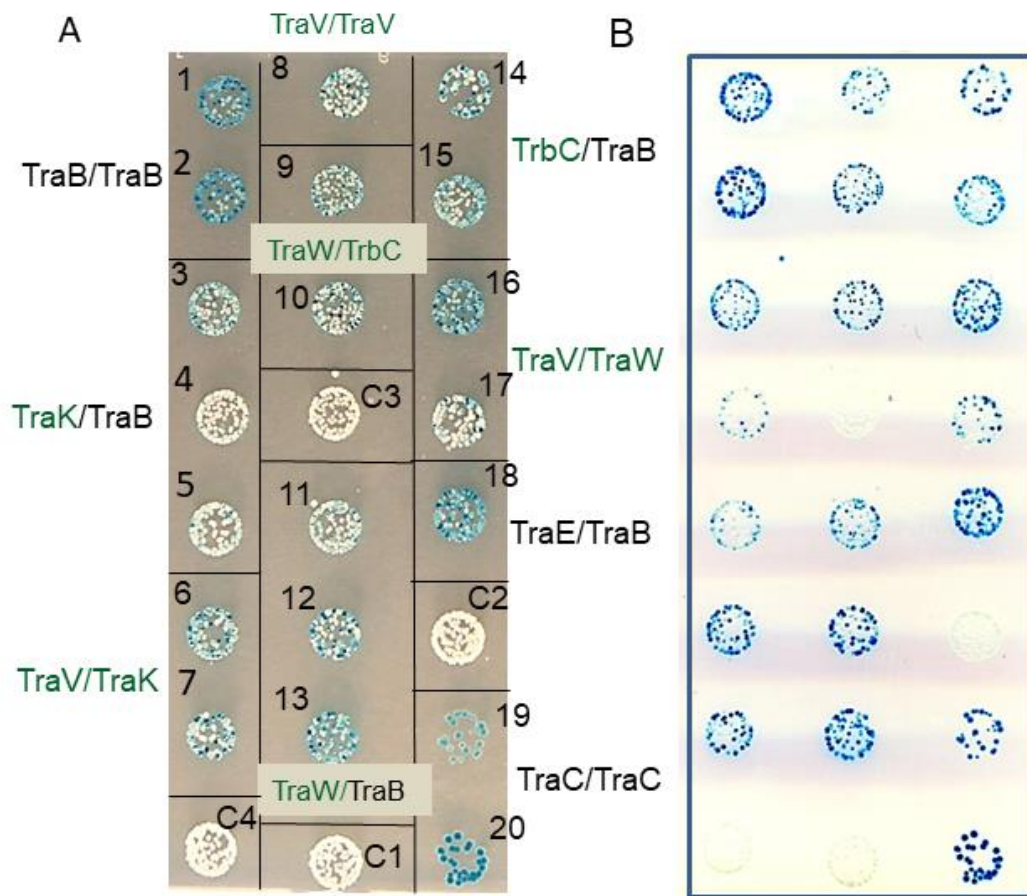

**Fig. S3.** Mixed interactions (defined as interactions between a protein from the *N. gonorrhoeae* T4SS and a protein from the F-plasmid T4SS) corresponding to interactions observed with both *N. gonorrhoeae* and F-plasmid proteins. **A.** Photograph of colonies of *E. coli* BTH101 transformants carrying plasmids encoding the proteins indicated in the order T18/T25. Protein names in green indicate that the gene encoding the protein was cloned in a BACTH-TM system vector, black names indicate that the gene was cloned into the BACTH system vector. C1, C2 and C4 are vector controls; respectively pUT18C/pKT25, pUTM18C/pKTM25 and pUT18C/pKTM25. The following interactions are shown: 1. TraB<sub>N</sub>/TraB<sub>F</sub>, 2. TraB<sub>F</sub>/TraB<sub>N</sub>, 3. TraB<sub>N</sub>/TM-TraK<sub>F</sub>, 4. TM-TraK<sub>F</sub>/TraB<sub>N</sub>, 5. TM-TraK<sub>N</sub>/TraB<sub>F</sub>, 6. TM-TraV<sub>F</sub>/TM-TraK<sub>N</sub>, 7. TM-TraV<sub>N</sub>/TM-TraK<sub>F</sub>, 8. TM-TraV<sub>F</sub>/TM-TraV<sub>N</sub>, 9. TM-TrbC<sub>F</sub>/TM-TraW<sub>N</sub>, 10. TM-TraW<sub>N</sub>/TM-TrbC<sub>F</sub>, 11. TM-TraW<sub>F</sub>/TraB<sub>N</sub>, 12. TraB<sub>F</sub>/TM-TraW<sub>N</sub>, 13. TM-TraW<sub>N</sub>/TraB<sub>F</sub>, 14. TM-TrbC<sub>F</sub>/TraB<sub>N</sub>, 15. TM-TrbC<sub>N</sub>/TraB<sub>F</sub>, 16. TM-TraV<sub>N</sub>/TM-TraW<sub>F</sub>, 17. TM-TraV<sub>F</sub>/TM-TraW<sub>N</sub>, 18. TraE<sub>N</sub>/TraB<sub>F</sub>, 19. pUT18TraC<sub>N</sub>/pKT25TraC<sub>F</sub>, 20. pUT18TraC<sub>N</sub>/pKT25TraC<sub>F</sub>. **B.** Image obtained by scanning the agar plate

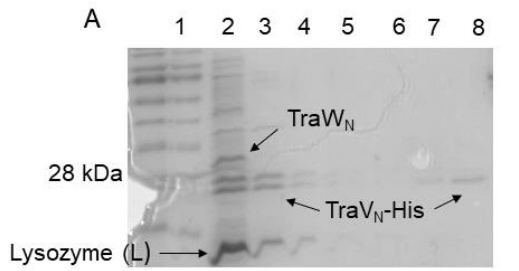

1. Standard
2. TraV<sub>N</sub>/TraW<sub>N</sub> loading †
3. TraV<sub>N</sub> run through
4. TraV<sub>N</sub> wash 1
5. TraV<sub>N</sub> wash 2
6. TraV<sub>N</sub> wash 3
7. TraV<sub>N</sub> elution 1 125 mM imidazole
8. TraV<sub>N</sub> elution 2 250 mM imidazole

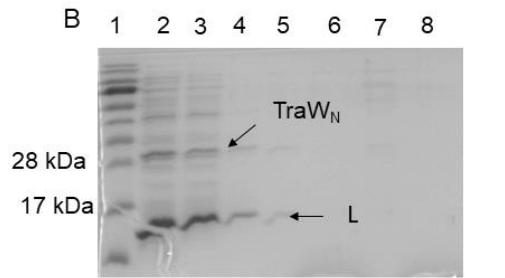

1. Standard
2. TraW<sub>N</sub> loading
3. TraW<sub>N</sub> run through
4. TraW<sub>N</sub> wash 1
5. TraW<sub>N</sub> wash 2
6. TraW<sub>N</sub> wash 3
7. TraW<sub>N</sub> elution 1 125 mM imidazole
8. TraW<sub>N</sub> elution 2 250 mM imidazole

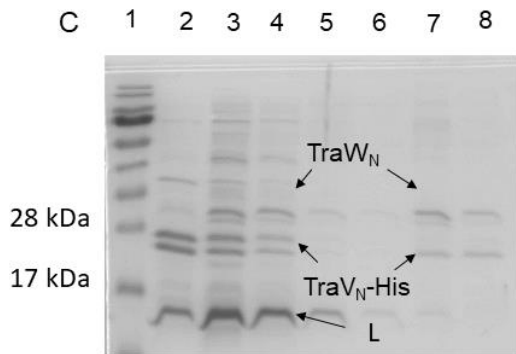

1. Standard
2. TraV<sub>N</sub> loading †
3. TraV<sub>N</sub> /TraW<sub>N</sub> run through
4. TraV<sub>N</sub> /TraW<sub>N</sub> wash 1
5. TraV<sub>N</sub> /TraW<sub>N</sub> wash 2
6. TraV<sub>N</sub> /TraW<sub>N</sub> wash 3
7. TraV<sub>N</sub> / TraW<sub>N</sub> elution 125 mM imidazole
8. TraV<sub>N</sub> /TraW<sub>N</sub> elution 250 mM imidazole

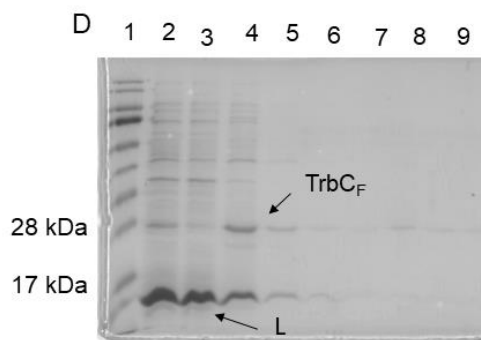

1. Standard
2. TrbC<sub>F</sub> loading
3. TrbC<sub>F</sub> run through
4. TrbC<sub>F</sub> wash 1
5. TrbC<sub>F</sub> wash 2
6. TrbC<sub>F</sub> wash 3
7. TrbC<sub>F</sub> wash 4
8. TrbC<sub>F</sub> elution 1 125 mM imidazole
9. TrbC<sub>F</sub> elution 2 250 mM imidazole

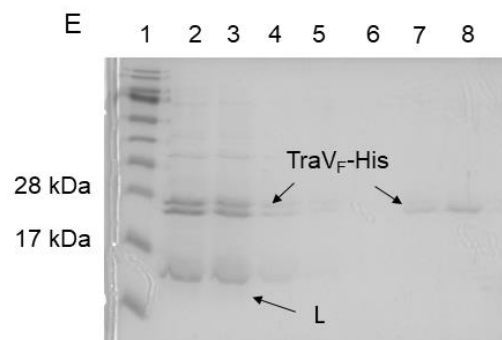

1. Standard
2. TraV<sub>F</sub> loading
3. TraV<sub>F</sub> run through
4. TraV<sub>F</sub> wash 1
5. TraV<sub>F</sub> wash 2
6. TraV<sub>F</sub> wash 3
7. TraV<sub>F</sub> elution 1 125 mM imidazole
8. TraV<sub>F</sub> elution 2 250 mM imidazole

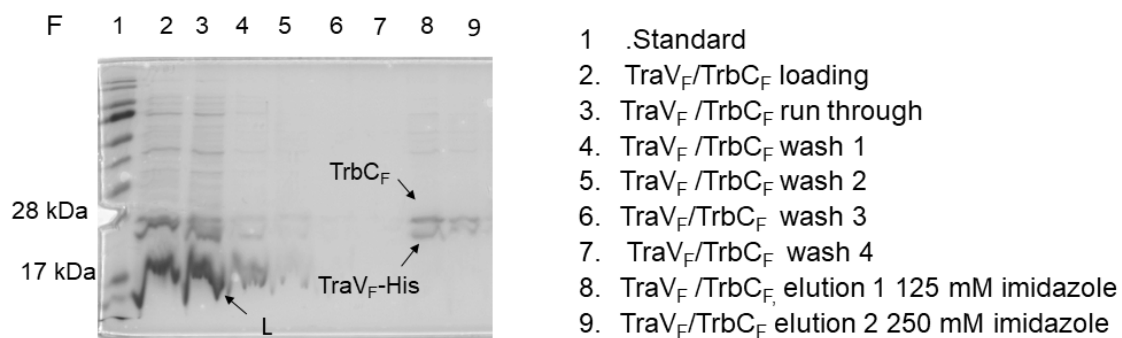

**Fig. S4. Pull-down experiments.** **A.** Pull-down results for lysate from *E. coli* BL21(DE3)(pET22bTraV<sub>N</sub>) mixed with lysate from *E. coli* BL21(DE3)(pCOLADuet). † By a mistake TraV<sub>N</sub>/TraW<sub>N</sub> loading is shown on Gel A while the TraV<sub>N</sub> loading is shown on Gel C. **B.** Pull-down results for lysate from *E. coli* BL21(DE3)(pCOLADuetTraW<sub>N</sub>) mixed with lysate from *E. coli* BL21(DE3)(pET22b). **C.** Pull-down results for lysate from *E. coli* BL21(pET22bTraV<sub>N</sub>) mixed with lysate from *E. coli* BL21(DE3)(pCOLADuetTraW<sub>N</sub>). **D.** Pull-down results for lysate from *E. coli* Origami-2(DE3)(pCOLADuetTrbC<sub>F</sub>) mixed with lysate from *E. coli* BL21(DE3)(pET22b). **E.** Pull-down results for lysate from *E. coli* BL21(pET22bTraV<sub>F</sub>) mixed with lysate from *E. coli* Origami-2(DE3)(pCOLADuet). **F.** Pull-down results for lysate from *E. coli* BL21(pET22bTraV<sub>F</sub>) mixed with lysate from *E. coli* Origami-2(DE3)(pCOLADuetTrbC<sub>F</sub>). Only a partial resin binding of His-TraV<sub>N</sub> and His-TraV<sub>F</sub> was observed probably due to some His-TraV<sub>N</sub> and His-TraV<sub>F</sub> being trapped in inclusion bodies (**A**, **C** and **E**).

## References

- Claessen, D., Emmins, R., Hamoen, L.W., Daniel, R.A., Errington, J., and Edwards, D.H. (2008) Control of the cell elongation–division cycle by shuttling of PBP1 protein in *Bacillus subtilis*. *Mol Microbiol* **68**: 1029–1046.
- Karimova, G., Ullmann, A., and Ladant, D. (2001) Protein-protein interaction between *Bacillus stearothermophilus* tyrosyl-tRNA synthetase subdomains revealed by a bacterial two-hybrid system. *J Mol Microbiol Biotechnol* **3**: 73–82.
- Kohler, P.L., Chan, Y.A., Hackett, K.T., Turner, N., Hamilton, H.L., Cloud-Hansen, K.A., and Dillard, J.P. (2013) Mating pair formation homologue TraG is a variable membrane protein essential for contact-independent type IV secretion of chromosomal DNA by *Neisseria gonorrhoeae*. *J Bacteriol* **195**: 1666–1679.
- Kohler, P.L., Hamilton, H.L., Cloud-Hansen, K., and Dillard, J.P. (2007) AtlA functions as a peptidoglycan lytic transglycosylase in the *Neisseria gonorrhoeae* type IV secretion system. *J Bacteriol* **189**: 5421–5428.
- Tellechea-Luzardo, J., Winterhalter, C., Widera, P., Kozyra, J., de Lorenzo, V. and Krasnogor, N. (2020) Linking Engineered Cells to Their Digital Twins: A Version Control System for Strain Engineering. *ACS Synthetic Biology* **9**: 536-545
- Ouellette, S.P., Gaudiard, E., Antosová, Z., and Ladant, D. (2014) A Gateway<sup>®</sup>-compatible bacterial adenylate cyclase-based two-hybrid system: A Gateway-compatible bacterial two-hybrid system. *Environ Microbiol Rep* **6**: 259–267.
- Ramsey, M.E., Hackett, K.T., Kotha, C., and Dillard, J.P. (2012) New complementation constructs for inducible and constitutive gene expression in *Neisseria gonorrhoeae* and *Neisseria meningitidis*. *Appl Environ Microbiol* **78**: 3068–3078.
- Ramsey, M.E., Hackett, K.T., Bender, T., Kotha, C., van der Does, C., and Dillard, J.P. (2014) TraK and TraB are conserved outer membrane proteins of the *Neisseria gonorrhoeae* Type IV secretion system and are expressed at low levels in wild-type cells. *J Bacteriol* **196**: 2954–2968.
- Swanson, J. (1972) Studies on gonococcus infection. II. Freeze-fracture, freeze-etch studies on gonocci. *J Exp Med* **136**: 1258–1271.
